# Supplementary material
Source: publisher figshare collection journal article supplement (https://gsajournals.figshare.com/articles/dataset/_/6939758)
Supplement: Supplementary file 1 [file 1]

## Sheet: TableS2-AllSequencingReads
Table S2: Detail of all sequencing reads.
			Coverage (x)					All Reads				Reads >1 kb				Reads >10 kb				Reads >50 kb
Species	Run number	Reads (Pass/Fail/All)	All	>1 kb	>10 kb	>50 kb		Number of reads	Bases	Average length (bp)		Number of reads	Bases	Average length (bp)		Number of reads	Bases	Average length (bp)		Number of reads	Bases	Average length (bp)		Longest read (bp)
D. ananassae	1	pass	44.8422	42.9349	20.1165	0.083084		2085829	8815982923	4227		1409289	8441000552	5990		252071	3954894304	15690		270	16334322	60497		110391
	1	fail	1.33115	1.15261	0.200774	0.00326865		176670	261704557	1481		62598	226603332	3620		2885	39472159	13682		7	642617	91802		110670
		all	46.1734	44.0875	20.3172	0.0863527		2262499	9077687480	4012.24		1471887	8667603884	5888.77		254956	3994366463	15666.9		277	16976939	61288.6		110670
D. biarmipes	1	pass	28.8486	27.4548	12.9068	0.0292892		1375651	5642786624	4102		861668	5370161093	6232		166579	2524572397	15155		95	5728966	60305		101492
	1	fail	5.02783	4.62745	1.81595	0.00696088		361407	983444340	2721		166166	905128435	5447		24056	355199038	14766		18	1361548	75642		192365
		all	33.8764	32.0823	14.7228	0.0362501		1737058	6626230964	3814.63		1027834	6275289528	6105.35		190635	2879771435	15106.2		113	7090514	62747.9		101492
D. bipectinata	1	pass	16.2796	14.2375	5.35712	0.0106481		1453689	3330807536	2291		594316	2912984569	4901		72567	1096067390	15104		38	2178606	57332		81838
	1	fail	5.32664	4.22123	1.2034	0.00265696		783036	1089829718	1392		212102	863662746	4072		16869	246214901	14596		8	543613	67952		114974
	2	pass	6.33079	6.28231	4.54624	1.09937		136492	1295279217	9490		122032	1285361153	10533		37121	930159766	25058		3202	224930297	70247		279705
	2	fail	0.635823	0.625733	0.396862	0.0715553		19142	130089478	6796		15741	128024982	8133		3555	81197933	22840		222	14640217	65947		153709
		all	28.5729	25.3667	11.5036	1.18423		2392359	5846005949	2443.62		944191	5190033450	5496.8		130112	2353639990	18089.3		3470	242292733	69825		279705
D. erecta	1	pass	21.8397	20.7457	9.83824	0.0557319		894435	3470335874	3880		536455	3296491307	6145		98325	1563296981	15899		150	8855791	59039		91749
	1	fail	5.55137	4.65077	1.32875	0.00433374		552558	882113340	1596		186516	739007773	3962		14109	211138357	14965		11	688632	62603		91339
	2	pass	9.84402	9.8187	7.61578	1.13227		128111	1564215047	12210		122281	1560191472	12759		52753	1210147497	22940		2876	179917241	62558		176712
	2	fail	1.1651	1.12407	0.765215	0.06689		42110	185133793	4396		19191	178615300	9307		5856	121592605	20764		177	10628821	60050		108455
		all	38.4002	36.3392	19.548	1.25922		1617214	6101798054	3773		864443	5774305852	6680		171043	3106175440	18160		3214	200090485	62256		176712
D. eugracilis	1	pass	17.5507	16.3478	5.10613	0.00223081		1262520	4017355292	3182		765996	3742001236	4885		84086	1168793542	13900		9	510632	56737		70345
	1	fail	4.72837	4.18451	1.03458	0.00305197		509377	1082323916	2125		223475	957833877	4286		17211	236814920	13760		8	698596	87324		172020
	2	pass	4.95705	4.89145	3.05462	0.36708		161906	1134668799	7008		139485	1119653368	8027		33230	699203649	21041		1300	84024674	64634		152351
	2	fail	0.782356	0.761971	0.391884	0.0338957		35558	179081348	5036		27974	174415077	6235		4628	89702251	19383		121	7758734	64122		157907
		all	28.0185	26.1857	9.58722	0.406259		1969361	6413429355	3256.6		1156930	5993903558	5180.87		139155	2194514362	15770.3		1438	92992636	64668		172020
D. triauraria	1	pass	18.7794	18.6815	13.1325	2.46893		409756	3947438546	9634		379831	3926860957	10338		120668	2760456002	22876		7512	518968565	69085		238837
	1	fail	1.75051	1.72976	1.0455	0.133976		53073	367956443	6933		45643	363595013	7966		10588	219763536	20756		434	28161765	64889		144090
		all	20.5299	20.4113	14.178	2.6029		462829	4315394989	9323.95		425474	4290455970	10083.9		131256	2980219538	22705.4		7946	547130330	68856.1		238837
D. mauritiana	1	pass	32.6485	32.0954	17.1351	0.0267132		852775	5155193679	6045		717219	5067856400	7066		175669	2705625608	15402		70	4218017	60257		93106
	1	fail	5.57695	5.42816	2.49571	0.00331456		185181	880601153	4755		135982	857106478	6303		26777	394073157	14717		9	523369	58152		69180
		all	38.2254	37.5235	19.6308	0.0300278		1037956	6035794832	5815.08		853201	5924962878	6944.39		202446	3099698765	15311.2		79	4741386	60017.5		93106
D. mojavensis	1	pass	18.1645	16.8407	4.10469	0.0014877		1021611	3020764210	2957		642806	2800602905	4357		51154	682610399	13344		4	247405	61851		78442
	1	fail	4.78853	4.13158	0.622956	0.00111126		421607	796332332	1889		193917	687082453	3543		8000	103597594	12950		3	184802	61601		75924
	2	pass	27.2374	27.1163	19.4123	3.74646		450348	4529581859	10058		421016	4509440070	10711		138148	3228259821	23368		9130	623036366	68241		245241
	2	fail	3.76075	3.65225	2.27875	0.341919		136480	625412592	4582		73846	607370004	8225		17781	378955952	21312		859	56861087	66195		167261
		all	53.9512	51.7408	26.4187	4.09098		2030046	8972090993	4419.65		1331585	8604495432	6461.84		215083	4393423766	20426.6		9996	680329660	68060		245241
D. persimilis	1	pass	34.5435	33.6141	15.4775	0.0642852		1386759	6808521517	4910		1072290	6625334575	6179		199330	3050611712	15304		215	12670616	58933		113218
	1	fail	7.85829	7.51733	3.18884	0.0121534		406297	1548869492	3812		255213	1481665715	5806		41863	628521179	15014		40	2395433	59886		81233
		all	42.4018	41.1314	18.6663	0.0764386		1793056	8357391009	4660.98		1327503	8107000290	6106.95		241193	3679132891	15253.9		255	15066049	59082.5		113218
D. pseudoobscura	1	pass	33.2662	31.6845	13.7954	0.0181926		1417469	5578741641	3936		905571	5313492967	5868		154234	2313485930	15000		52	3050893	58671		104401
	1	fail	7.21303	6.4591	2.06486	0.00431965		539516	1209624616	2242		235093	1083190899	4607		23986	346276568	14437		10	724406	72441		140078
		all	40.4792	38.1436	15.8602	0.0225122		1956985	6788366257	3468.79		1140664	6396683866	5607.86		178220	2659762498	14924		62	3775299	60891.9		104401
D. sechellia	1	pass	23.8842	23.7856	16.8685	4.47026		390359	3981494887	10200		366174	3965056314	10828		110941	2811971357	25347		10362	745191731	71916		254031
	1	fail	3.53185	3.47564	2.21246	0.418931		94303	588758775	6243		66650	579389173	8693		16058	368816971	22968		1041	69835767	67085		184841
		all	27.416	27.2612	19.0809	4.88919		484662	4570253662	9429.78		432824	4544445487	10499.5		126999	3180788328	25045.8		11403	815027498	71474.8		254031
D. simulans	1	pass	1.114	0.928184	0.24724	0.000321654		102280	177794518	1738		36926	148138239	4012		2739	39459431	14407		1	51336	51336		51336
	1	fail	0.524485	0.299571	0.0462585	0		137614	83707852	608		16642	47811465	2873		509	7382849	14505		0	0	-		48774
	2	pass	29.113	29.06	24.8155	8.16816		286998	4646433640	16190		274963	4637978674	16868		137457	3960549776	28813		17656	1303637809	73835		309608
	2	fail	4.41014	4.33654	3.49736	0.977532		92057	703858269	7646		51209	692111787	13515		20911	558178180	26693		2149	156014116	72598		234017
		all	35.1616	34.6243	28.6063	9.14601		618949	5611794279	9066.65		379740	5526040165	14552.2		161616	4565570236	28249.5		19806	1459703261	73700.1		309608
D. virilis	1	pass	6.07643	6.02768	3.68286	0.345425		262081	1977269087	7544		239104	1961408332	8203		58270	1198403874	20566		1829	112401295	61455		130209
	1	fail	1.62409	1.58093	0.882971	0.0616977		110246	528480036	4794		73996	514435955	6952		14614	287318679	19661		330	20076421	60838		109290
	2	pass	16.1181	15.7757	8.20319	1.12545		947858	5244818524	5533		777912	5133398965	6599		131302	2669319225	20330		5291	366221394	69216		282795
	2	fail	3.9725	3.82571	1.7627	0.187552		306802	1292651613	4213		220377	1244885115	5649		29678	573581246	19327		888	61029407	68727		217601
		all	27.7911	27.21	14.5317	1.72012		1626987	9043219260	5558.26		1311389	8854128367	6751.72		233864	4728623024	20219.5		8338	559728517	67129.8		282795
D. willistoni	1	pass	28.4914	26.1539	12.9312	0.0697304		1868768	5852128716	3132		923706	5372010357	5816		158505	2656064904	16757		248	14322633	57753		100073
	1	fail	4.56035	3.90123	1.551	0.0106196		493988	936695344	1896		166830	801312375	4803		19785	318574579	16102		36	2181257	60590		102831
		all	33.0517	30.0551	14.4822	0.08035		2362756	6788824060	2873.26		1090536	6173322732	5660.82		178290	2974639483	16684.3		284	16503890	58112.3		100073
D. yakuba	1	pass	21.7323	21.5419	12.5892	1.77119		509806	3709700946	7277		462732	3677208428	7947		103820	2148982825	20699		4459	302341367	67805		195439
	1	fail	3.33257	3.26542	1.50048	0.138064		111370	568870321	5108		92335	557407330	6037		13536	256131256	18922		365	23567518	64569		176954
		all	25.0649	24.8074	14.0897	1.90925		621176	4278571267	6887.86		555067	4234615758	7629.02		117356	2405114081	20494.2		4824	325908885	67559.9		195439
Total, pass reads								17405501	83901313082	4820.39		11771772	80866631933	6869.54		2338969	43372936390	18543.6		64769	4528839956	69923
Total, fail reads								5568392	14925539328	2680.4		2541496	13690655284	5386.85		333255	5822503910	17471.6		6736	458518126	68069.8
Total, all reads								22973893	98826852410	4301.7		14313268	94557287217	6606.27		2672224	49195440300	18409.9		71505	4987358082	69748.4
